# Supplementary material
Source: PubMed Central journal article supplement (PMC6993927)
Supplement: fj.201801379R.sd5.pdf [file fj.201801379R.sd5.pdf]

## Suppl. Data Set 5.

### Conversion of SSBs into DSBs and localization of XRCC1 foci in inter-chromatin compartment

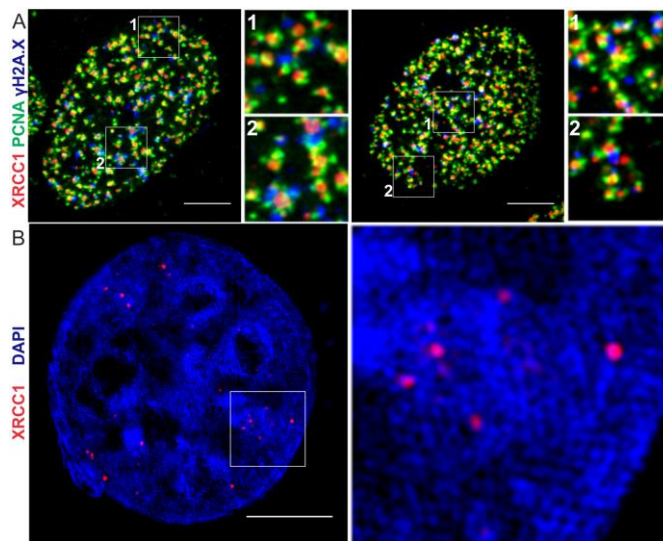

#### Supplementary Figure 5. Localization of XRCC1-containing nuclear bodies in relation to DSBs and heterochromatin.

**A.** DNA double strand breaks in nuclei of cells containing XRCC1 foci (mRFP-XRCC1 (red), mEGFP-PCNA (green),  $\gamma$ H2A.X (blue, IF)).  $\gamma$ H2A.X foci are located close to the regions of replication and, at the same time, XRCC1 bodies. **B.** Localization of XRCC1 foci (mRFP-XRCC1) in perichromatin regions of the cell nucleus. XRCC1 bodies are always located in the regions of low DNA density (perichromatin regions). It is detectable even though the presented 3D SIM images of DNA show remnants of artifactual periodic pattern often encountered in SIM images. Exclusion from regions of high DNA density may be a consequence of the size of XRCC1 bodies (300 - 400 nm in diameter). Scale bars: 5  $\mu$ m, ROIs: 4.3 x 4.3  $\mu$ m.

Frequent cell death, which we observed in cells containing large numbers of XRCC1 foci adjacent to replication, could result from an overwhelming quantity of SSBs, or from

conversion of many SSBs into DSBs. In order to establish if the replication-related SSBs, described here, were subsequently converted to DSBs, we recorded images of replicating cells with mRFP-XRCC1 foci and immunofluorescently labeled histone  $\gamma$ H2A.X. The images presented in Suppl. Fig. 5A show that generally less  $\gamma$ H2A.X foci, likely marking DNA double-strand breaks (1), than XRCC1 foci, that mark the single-strand DNA breaks, could be detected. A great majority of  $\gamma$ H2A.X foci were located close to replicating DNA. This observation suggests that some (although not all) replication-related SSBs, were transformed into DSBs. Notably, only very few  $\gamma$ H2A.X foci were detected at a distance from XRCC1 foci and replication regions, suggesting that the existing DSBs were created as a result of a conversion from replication-related SSBs (Suppl. Fig. 5A).

A thorough examination of the localization of XRCC1 foci in relation to the regions of high and low DNA density demonstrated that these foci were located exclusively in the so-called inter-chromatin compartment or perichromatin region (2–5). High resolution 3D SIM images showed XRCC1 foci mostly localized at the edges or within the compartment of chromatin characterized by low chromatin density and compaction (Suppl. Fig. 5B). This observation agrees with the detected formation of repair foci outside of active replication sites marking heterochromatin regions in mid S, after inducing local DNA damage (Fig. 5A). It is also in agreement with the hypothesis, which states that chromatin is remodeled in response to DNA damage, and DNA, which is undergoing repair, is pulled out of the regions of high DNA compaction (6–9).

#### References

1. Rogakou, E. P., Pilch, D. R., Orr, A. H., Ivanova, V. S., and Bonner, W. M. (1998) DNA double-stranded breaks induce histone H2AX phosphorylation on serine 139. *J. Biol. Chem.* **273**, 5858–5868
2. Cremer, T. and Cremer, C. (2001) Chromosome territories, nuclear architecture and gene regulation in mammalian cells. *Nat. Rev. Genet.* **2**, 292–301
3. Cremer, T., Küpper, K., Dietzel, S., and Fakan, S. (2004) Higher order chromatin architecture in the cell nucleus: On the way from structure to function. *Biol. Cell* **96**, 555–567
4. Fakan, S. and van Driel, R. (2007) The perichromatin region: A functional compartment in the nucleus that determines large-scale chromatin folding. *Semin. Cell Dev. Biol.* **18**, 676–681
5. Niedojadlo, J., Perret-Vivancos, C., Kalland, K. H., Cmarko, D., Cremer, T., Van Driel, R., and Fakan, S. (2011) Transcribed DNA is preferentially located in the perichromatin region of mammalian cell nuclei. *Exp. Cell Res.* **317**, 433–444
6. Green, C. M. and Almouzni, G. (2002) When repair meets chromatin. First in series on chromatin dynamics. *EMBO Rep.* **3**, 28–33
7. Groth, A., Rocha, W., Verreault, A., and Almouzni, G. (2007) Chromatin Challenges during DNA Replication and Repair. *Cell* **128**, 721–733
8. van Attikum, H. and Gasser, S. M. (2005) The histone code at DNA breaks: a guide to repair? *Nat. Rev. Mol. Cell Biol.* **6**, 757–765
9. Downs, J. a, Nussenzweig, M. C., and Nussenzweig, A. (2007) Chromatin dynamics and the preservation of genetic information. *Nature* **447**, 951–958
